# Supplementary material
Source: PubMed Central journal article supplement (PMC4919075)
Supplement: NIHMS794417-supplement-supplement_1.pdf [file NIHMS794417-supplement-supplement_1.pdf]

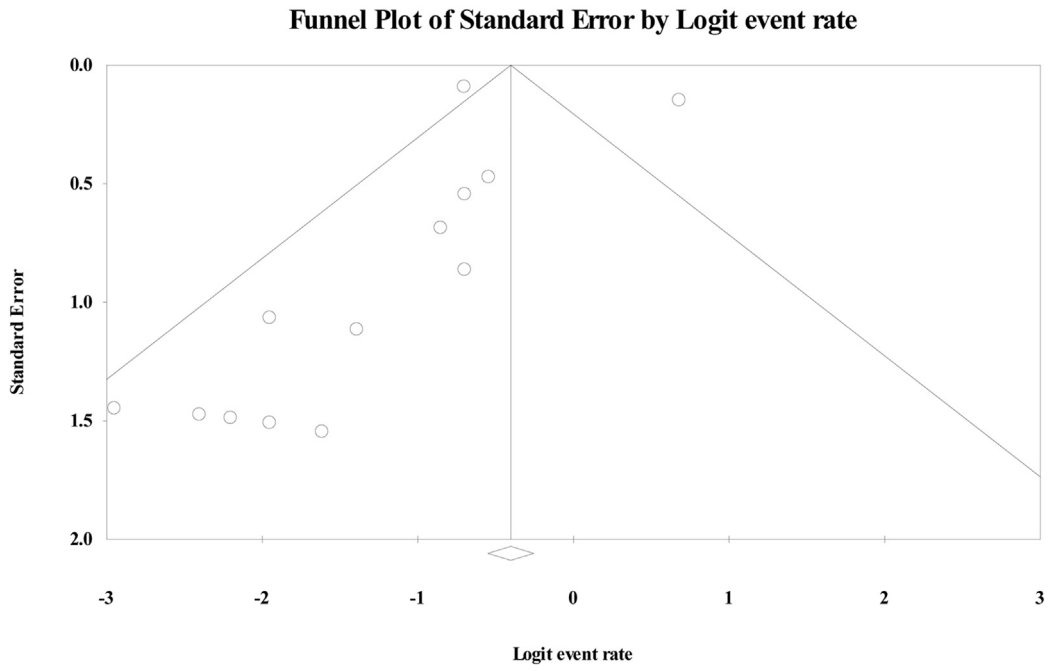

**Supplementary Figure 1.** Funnel plot for the primary outcome of proportion missed EAC.

**Supplementary Table 1.** Quality Scoring Scheme

| Question                                             | Scoring scheme                                                                                                                                                                                                                                                                                                                           |
|------------------------------------------------------|------------------------------------------------------------------------------------------------------------------------------------------------------------------------------------------------------------------------------------------------------------------------------------------------------------------------------------------|
| Representative of the average adult in the community | 1 point for population-based studies<br>0.5 point for multicenter studies<br>0 point for a single-center hospital-based study                                                                                                                                                                                                            |
| Large cohort size                                    | 1 point for cohort size >200 patients with BE<br>0.5 point if cohort size 100–200 patients<br>0 point if cohort size <100 patients                                                                                                                                                                                                       |
| Definition of BE                                     | 1 point if by histology and endoscopy<br>0.5 point if by endoscopy only<br>0 point if not reported                                                                                                                                                                                                                                       |
| Baseline histologic characterization of cohort       | 1 point if consisted of patients with NDBE only<br>0.5 point for NDBE and BE-LGD only<br>0 point for NDBE, BE-LGD and BE-HGD                                                                                                                                                                                                             |
| Surveillance protocol                                | 1 point for endoscopy every 3–5 years for patients with NDBE and annually for patients with BE-LGD (or more frequently)<br>0.5 point for endoscopy greater than every 3–5 years for patients with NDBE and/or greater than 1 year for patients with BE-LGD<br>0 point for no surveillance or surveillance protocol not reported in study |
| Adequate biopsy protocol                             | 1 point for 4-quadrant biopsies every 1–2 cm<br>0.5 point for <4-quadrant biopsies every 1–2 cm<br>0 point for not reported                                                                                                                                                                                                              |
| Adequate follow-up of cohort for outcome to occur    | 1 point for mean/median follow-up >8 y<br>0.5 point for follow-up 5–8 y<br>0 point for follow-up 2–5 y                                                                                                                                                                                                                                   |
| Attrition rate                                       | 1 point for >90% of cohort followed-up<br>0.5 point for 80%–90% of cohort followed-up<br>0 point for >20% lost to follow-up                                                                                                                                                                                                              |
| Method of capturing HGD-EAC diagnosis                | 1 point for pathology database<br>0.5 point for clinical database<br>0 point for not reported                                                                                                                                                                                                                                            |

**Supplementary Table 2.** Characteristics of Included Studies, Categorized by Duration of Follow-Up and Baseline Histology of Cohort

| Study, first author, year                        | Country        | Setting | Total no. of BE subjects | No. of subjects under follow-up | Mean age, y       | Male, %           | Mean BE length, % | LSBE, %           | NDBE, % | BE-IND, % | BE-LGD, % | BE-HGD, % | At least 1 repeat EGD, % | Interval for Missed HGD-EAC, mo | Mean follow-up, y |
|--------------------------------------------------|----------------|---------|--------------------------|---------------------------------|-------------------|-------------------|-------------------|-------------------|---------|-----------|-----------|-----------|--------------------------|---------------------------------|-------------------|
| <b>Follow-up ≥5 y</b>                            |                |         |                          |                                 |                   |                   |                   |                   |         |           |           |           |                          |                                 |                   |
| <b>NDBE and BE-LGD</b>                           |                |         |                          |                                 |                   |                   |                   |                   |         |           |           |           |                          |                                 |                   |
| Hameeteman, 1989 <sup>40</sup>                   | Netherlands    | SC      | 50                       | 50 <sup>a</sup>                 | 59.3              | 58                | NR                | 100               | 86      | 2         | 10        | 2         | NR                       | 12 <sup>b</sup>                 | 5.2               |
| Spechler, 2001, <sup>36</sup> 1992 <sup>68</sup> | US             | SC      | 108                      | 108 <sup>a</sup>                | NR                | NR                | NR                | 100               | 87      | 0         | 13        | 0         | NR                       | 12 <sup>b</sup>                 | 9.6 <sup>c</sup>  |
| Conio, 2003 <sup>29</sup>                        | Italy          | MC      | 177                      | 166 <sup>a</sup>                | 59.9 <sup>d</sup> | 81.3              | 3.9               | 64.5              | 90.4    | 0         | 9.6       | 0         | 92.8                     | 12 <sup>b</sup>                 | 5.5               |
| Parrilla, 2003 <sup>28</sup>                     | Spain          | SC      | 146                      | 43 <sup>a,e</sup>               | 50 <sup>d</sup>   | 76.7              | 4 <sup>c</sup>    | NR                | 90.1    | 0         | 7         | 0         | NR                       | 12 <sup>b</sup>                 | 6                 |
| Martinek, 2008 <sup>23</sup>                     | Czech Republic | SC      | 151                      | 135 <sup>a</sup>                | 59.4              | 75.6              | 2.5               | 36.3              | 93.3    | 0         | 6.7       | 0         | 100                      | 12 <sup>b</sup>                 | 5.2               |
| Bhat, 2011 <sup>2</sup>                          | Ireland        | PB      | 9334                     | 8522                            | NR                | 57.9              | NR                | 58.2 <sup>f</sup> | 95.4    | 0.8       | 3.8       | 0         | 33.3                     | 12                              | 7                 |
| den Hoed, 2011 <sup>19</sup>                     | Netherlands    | SC      | 166                      | 133                             | 62.4              | 54.9              | 6.5               | 100               | 79.7    | 0         | 20.3      | 0         | NR                       | 12                              | 14.9              |
| Hvid-Jensen, 2011 <sup>3</sup>                   | Denmark        | PB      | 11,028                   | 11,028 <sup>a</sup>             | 62.7 <sup>d</sup> | 66.8              | NR                | NR                | NR      | NR        | 5.6       | 0         | NR                       | 12                              | 5.2 <sup>d</sup>  |
| <b>NDBE only</b>                                 |                |         |                          |                                 |                   |                   |                   |                   |         |           |           |           |                          |                                 |                   |
| Teodori, 1998 <sup>41</sup>                      | Italy          | SC      | 30                       | 30 <sup>a</sup>                 | 53                | 60                | NR                | NR                | 100     | 0         | 0         | 0         | 100                      | 12 <sup>b</sup>                 | 11.7 <sup>c</sup> |
| Eckardt, 2001 <sup>30</sup>                      | Germany        | SC      | 122                      | 60 <sup>a</sup>                 | 61                | 58.3              | 7                 | 100               | 100     | 0         | 0         | 0         | 84                       | 12 <sup>b</sup>                 | 10                |
| Gladman, 2006 <sup>25</sup>                      | UK             | SC      | 466                      | 195 <sup>a</sup>                | 62.9              | 55.4              | NR                | NR                | 100     | 0         | 0         | 0         | 100                      | 12 <sup>b</sup>                 | 5.5               |
| Vieth, 2006 <sup>24</sup>                        | Germany        | SC      | 1071                     | 748 <sup>a</sup>                | 60.9              | 67.8              | NR                | 56.1 <sup>f</sup> | 100     | 0         | 0         | 0         | 100                      | 14 <sup>b</sup>                 | 6.5               |
| <b>Follow-up ≥3 y</b>                            |                |         |                          |                                 |                   |                   |                   |                   |         |           |           |           |                          |                                 |                   |
| <b>NDBE and BE-LGD</b>                           |                |         |                          |                                 |                   |                   |                   |                   |         |           |           |           |                          |                                 |                   |
| Spechler, 1984 <sup>35</sup>                     | US             | SC      | 115                      | 107 <sup>e</sup>                | NR                | NR                | NR                | NR                | 59.8    | 29        | 3.7       | 0         | 73                       | 12 <sup>b</sup>                 | 3.3               |
| Miros, 1991 <sup>34</sup>                        | Australia      | SC      | 133                      | 81 <sup>a</sup>                 | NR                | NR                | NR                | 100               | 84      | 0         | 12.3      | 3.7       | NR                       | 12 <sup>b</sup>                 | 3.6               |
| Williamson, 1991 <sup>38</sup>                   | US             | SC      | 241                      | 176 <sup>a</sup>                | 56 <sup>d</sup>   | 63                | NR                | 100               | NR      | NR        | NR        | NR        | 100                      | 12 <sup>b</sup>                 | 3 <sup>d</sup>    |
| Katz, 1998 <sup>33</sup>                         | US             | SC      | 102                      | 102 <sup>a</sup>                | 63 <sup>d</sup>   | 82.4              | 6 <sup>c</sup>    | 100               | 95      | 0         | 5         | 0         | 100                      | 12 <sup>b</sup>                 | 4.8 <sup>d</sup>  |
| Reid, 2000 <sup>37</sup>                         | US             | SC      | 327                      | 327 <sup>a</sup>                | 62 <sup>d</sup>   | 81                | NR                | NR                | 39.4    | 24.2      | 13.1      | 23.2      | 100                      | 12 <sup>b</sup>                 | 3.9               |
| Dulai, 2005 <sup>27</sup>                        | US             | MC      | 650                      | 575                             | 60                | 99                | NR                | NR                | 76.7    | 0         | 23.3      | 0         | NR                       | 12                              | 4.8 <sup>c</sup>  |
| Murphy, 2005 <sup>26</sup>                       | Ireland        | SC      | 277                      | 178 <sup>a</sup>                | 57                | 71.3              | 5                 | 81.5              | NR      | NR        | 18.5      | 0         | 100                      | 12 <sup>b</sup>                 | 3.4               |
| Rossi, 2009 <sup>22</sup>                        | Italy          | SC      | 21                       | 21 <sup>a</sup>                 | 63 <sup>d</sup>   | 76.2              | 4.5 <sup>c</sup>  | 52.4              | 61.9    | 0         | 33.3      | 4.8       | 100                      | 12 <sup>b</sup>                 | 3 <sup>d</sup>    |
| de Jonge, 2010 <sup>21</sup>                     | Netherlands    | PB      | 42,207                   | 16,333                          | 62.1 <sup>d</sup> | 62.5 <sup>c</sup> | NR                | NR                | NR      | 0         | NR        | 0         | 100                      | 12                              | 4.8 <sup>c</sup>  |
| Vogt, 2010 <sup>20</sup>                         | Switzerland    | SC      | 137                      | 82 <sup>a</sup>                 | NR                | NR                | NR                | NR                | 76.8    | 12.2      | 11        | 0         | 100                      | 12 <sup>b</sup>                 | 3.7 <sup>d</sup>  |
| Kastelein, 2011 <sup>39</sup>                    | Netherlands    | MC      | 786                      | 570                             | 60.4 <sup>d</sup> | 72.3              | 4 <sup>c</sup>    | NR                | 86.1    | 0         | 13.9      | 0         | NR                       | 9                               | 4.5 <sup>d</sup>  |
| Rugge, 2012 <sup>42</sup>                        | Italy          | MC      | 1297                     | 841                             | 60 <sup>d</sup>   | 76.8              | 2 <sup>c</sup>    | 42                | 88.6    | 3.8       | 7.6       | 0         | 100                      | 12                              | 3.7 <sup>d</sup>  |
| Visrodia, 2015 <sup>9</sup>                      | US             | PB      | 488                      | 439 <sup>a</sup>                | NR                | NR                | NR                | NR                | 83.8    | 5.7       | 10.5      | 0         | 73.3                     | 12 <sup>b</sup>                 | 4.8 <sup>d</sup>  |
| <b>NDBE only</b>                                 |                |         |                          |                                 |                   |                   |                   |                   |         |           |           |           |                          |                                 |                   |
| Bani-Hani, 2000 <sup>32</sup>                    | UK             | SC      | 597                      | 357                             | 60.9              | 58                | 6.1               | 95.5              | 100     | 0         | 0         | 0         | 100                      | 6                               | 3.6               |
| Macdonald, 2000 <sup>31</sup>                    | UK             | SC      | 409                      | 143 <sup>a</sup>                | 57                | 60.1              | 8.1               | 100               | 100     | 0         | 0         | 0         | NR                       | 12 <sup>b</sup>                 | 4.4               |

BE-IND, Barrett’s esophagus with indefinite dysplasia; EGD, esophagogastroduodenoscopy; LSBE, long-segment Barrett’s esophagus; MC, multicenter; PB, population-based; SC, single-center; UK, United Kingdom; US, United States.

<sup>a</sup>Includes patients subsequently found to have missed HGD or EAC.

<sup>b</sup>Cutoff retrospectively applied and numbers of missed and incident EAC (or HGD-EAC) ascertained based on provided data.

<sup>c</sup>Calculated using provided data.

<sup>d</sup>Median reported where mean not available.

<sup>e</sup>Includes patients with unspecified baseline histology.

<sup>f</sup>Of patients with reported BE length.

**Supplementary Table 3.** Quality of the Studies, Categorized by Baseline Histology of Cohort

| Study, first author, year                        | Representative of the average adult in the community | Definition of BE | Adequacy of surveillance | Adequacy of biopsy protocol | Capture of dysplasia | Cohort size | Cohort baseline dysplasia | Length of follow-up | Attrition rate | Total <sup>a</sup> |
|--------------------------------------------------|------------------------------------------------------|------------------|--------------------------|-----------------------------|----------------------|-------------|---------------------------|---------------------|----------------|--------------------|
| Follow-up $\geq 5$ y                             |                                                      |                  |                          |                             |                      |             |                           |                     |                |                    |
| NDBE and BE-LGD                                  |                                                      |                  |                          |                             |                      |             |                           |                     |                |                    |
| Hameeteman, 1989 <sup>40</sup>                   | 0                                                    | 0.5              | 1                        | 0.5                         | 1                    | 0           | 0                         | 0.5                 | 0              | 3.5                |
| Spechler, 2001, <sup>36</sup> 1992 <sup>68</sup> | 0                                                    | 1                | 0                        | 0.5                         | 1                    | 0.5         | 0.5                       | 1                   | 1              | 5.5                |
| Conio, 2003 <sup>29</sup>                        | 0.5                                                  | 1                | 1                        | 0.5                         | 1                    | 0.5         | 0.5                       | 0.5                 | 1              | 6.5                |
| Parrilla, 2003 <sup>28</sup>                     | 0                                                    | 0.5              | 1                        | 0.5                         | 1                    | 0           | 0.5                       | 0                   | 0              | 3.5                |
| Martinek, 2008 <sup>23</sup>                     | 0                                                    | 1                | 1                        | 1                           | 1                    | 0.5         | 0.5                       | 0.5                 | 1              | 6.5                |
| Bhat, 2011 <sup>2</sup>                          | 1                                                    | 0.5              | 0                        | 0                           | 1                    | 1           | 0.5                       | 0.5                 | 1              | 5.5                |
| den Hoed, 2011 <sup>19</sup>                     | 0                                                    | 1                | 0                        | 0                           | 1                    | 0.5         | 0.5                       | 1                   | 1              | 5                  |
| Hvid-Jensen, 2011 <sup>3</sup>                   | 1                                                    | 1                | 0                        | 0                           | 1                    | 1           | 0.5                       | 0.5                 | 1              | 6                  |
| NDBE only                                        |                                                      |                  |                          |                             |                      |             |                           |                     |                |                    |
| Teodori, 1998 <sup>41</sup>                      | 0                                                    | 1                | 1                        | 1                           | 1                    | 0           | 1                         | 1                   | 0              | 6                  |
| Eckardt, 2001 <sup>30</sup>                      | 0                                                    | 1                | 0.5                      | 0.5                         | 1                    | 0           | 1                         | 1                   | 1              | 6                  |
| Gladman, 2006 <sup>25</sup>                      | 0                                                    | 1                | 1                        | 0.5                         | 1                    | 0.5         | 1                         | 0.5                 | 0.5            | 6                  |
| Vieth, 2006 <sup>24</sup>                        | 0                                                    | 1                | 0                        | 0.5                         | 1                    | 1           | 1                         | 0.5                 | 1              | 6                  |
| Follow-up $\geq 3$ y                             |                                                      |                  |                          |                             |                      |             |                           |                     |                |                    |
| NDBE and BE-LGD                                  |                                                      |                  |                          |                             |                      |             |                           |                     |                |                    |
| Spechler, 1984 <sup>35</sup>                     | 0                                                    | 0.5              | 0.5                      | 0.5                         | 1                    | 0.5         | 0.5                       | 0                   | 1              | 4.5                |
| Miros, 1991 <sup>34</sup>                        | 0                                                    | 1                | 1                        | 0.5                         | 1                    | 0.5         | 0                         | 0                   | 1              | 5                  |
| Williamson, 1991 <sup>38</sup>                   | 0                                                    | 1                | 1                        | 0.5                         | 1                    | 0.5         | 0                         | 0                   | 1              | 5                  |
| Katz, 1998 <sup>33</sup>                         | 0                                                    | 1                | 1                        | 1                           | 1                    | 0.5         | 0.5                       | 0                   | 1              | 6                  |
| Reid, 2000 <sup>37</sup>                         | 0                                                    | 1                | 1                        | 0.5                         | 1                    | 1           | 0                         | 0                   | 0              | 4.5                |
| Dulai, 2005 <sup>27</sup>                        | 0.5                                                  | 1                | 0                        | 0                           | 1                    | 1           | 0.5                       | 0                   | 1              | 5                  |
| Murphy, 2005 <sup>26</sup>                       | 0                                                    | 1                | 1                        | 0                           | 1                    | 0.5         | 0.5                       | 0                   | 1              | 5                  |
| Rossi, 2009 <sup>22</sup>                        | 0                                                    | 1                | 1                        | 1                           | 1                    | 0           | 0                         | 0                   | 1              | 5                  |
| de Jonge, 2010 <sup>21</sup>                     | 1                                                    | 1                | 0                        | 0                           | 1                    | 1           | 0.5                       | 0                   | 1              | 5.5                |
| Vogt, 2010 <sup>20</sup>                         | 0                                                    | 1                | 1                        | 1                           | 1                    | 0           | 0.5                       | 0                   | 1              | 5.5                |
| Kastelein, 2011 <sup>39</sup>                    | 0.5                                                  | 1                | 1                        | 1                           | 1                    | 1           | 0.5                       | 0                   | 1              | 7                  |
| Rugge, 2012 <sup>42</sup>                        | 0.5                                                  | 1                | 1                        | 1                           | 1                    | 1           | 0.5                       | 0                   | 0              | 6                  |
| Visrodia, 2015 <sup>9</sup>                      | 1                                                    | 1                | 0.5                      | 0.5                         | 1                    | 1           | 0.5                       | 0                   | 0              | 5.5                |
| NDBE only                                        |                                                      |                  |                          |                             |                      |             |                           |                     |                |                    |
| Bani-Hani, 2000 <sup>32</sup>                    | 0                                                    | 0.5              | 0                        | 0                           | 0                    | 1           | 1                         | 0                   | 1              | 3.5                |
| Macdonald, 2000 <sup>31</sup>                    | 0                                                    | 1                | 1                        | 0.5                         | 1                    | 0.5         | 1                         | 0                   | 0.5            | 5.5                |

<sup>a</sup>Maximum = 9; high quality >6; medium quality 5–6; low quality <5.

**Supplementary Table 4.** Additional Extraction of Outcomes for Subjects With NDBE Only From Studies With Cohorts Composed of Subjects With Baseline NDBE, BE-LGD, and/or BE-HGD

| Study                          | EAC    |          | HGD-EAC |          |
|--------------------------------|--------|----------|---------|----------|
|                                | Missed | Incident | Missed  | Incident |
| NDBE only                      |        |          |         |          |
| Follow-up $\geq 5$ y           |        |          |         |          |
| Hameeteman, 1989 <sup>40</sup> | 0      | 2        | NR      | NR       |
| Conio, 2003 <sup>29</sup>      | 0      | 3        | 0       | 3        |
| Parrilla, 2003 <sup>28</sup>   | 0      | 1        | NR      | NR       |
| Martinek, 2008 <sup>23</sup>   | 0      | 2        | 0       | 2        |
| Follow-up $\geq 3$ y           |        |          |         |          |
| Miros, 1991 <sup>34</sup>      | 0      | 0        | 0       | 0        |
| Williamson, 1991 <sup>38</sup> | 0      | 4        | 0       | 4        |
| Reid, 2000 <sup>37</sup>       | 0      | 5        | NR      | NR       |
| Rossi, 2009 <sup>22</sup>      | 0      | 2        | 0       | 2        |
| Visrodia, 2015 <sup>9</sup>    | 0      | 7        | 1       | 11       |

**Supplementary Table 5.** Sensitivity Analysis to Examine Sources of Heterogeneity for Studies With at Least 5 Years Follow-Up

| Subgroup analysis        | No. of studies | Total cases | Missed |                            |           | Incident |                            |           | Heterogeneity $I^2$ , % | Heterogeneity between groups, $P$ value <sup>a</sup> |
|--------------------------|----------------|-------------|--------|----------------------------|-----------|----------|----------------------------|-----------|-------------------------|------------------------------------------------------|
|                          |                |             | n      | Pooled weighted proportion | 95% CI    | n        | Pooled weighted proportion | 95% CI    |                         |                                                      |
| Study quality            |                |             |        |                            |           |          |                            |           | 0.56                    |                                                      |
| EAC                      |                |             |        |                            |           |          |                            |           |                         |                                                      |
| High                     | 2              | 7           | 0      | 11.7                       | 1.6–51.8  | 7        | 88.3                       | 48.2–98.4 | 0                       |                                                      |
| Medium                   | 6              | 226         | 136    | 28.8                       | 10.3–58.8 | 90       | 71.2                       | 41.2–89.7 | 72                      |                                                      |
| Low                      | 2              | 6           | 0      | 12.8                       | 1.8–54.8  | 6        | 87.2                       | 45.2–98.2 | 0                       |                                                      |
| HGD-EAC                  |                |             |        |                            |           |          |                            |           | <b>0.10</b>             |                                                      |
| High                     | 2              | 7           | 0      | 11.7                       | 1.6–51.8  | 7        | 88.3                       | 48.2–98.4 | —                       |                                                      |
| Medium                   | 7              | 681         | 400    | 44.9                       | 31.8–58.8 | 281      | 55.1                       | 41.2–68.2 | 77                      |                                                      |
| Low                      | 0              | —           | —      | —                          | —         | —        | —                          | —         | —                       |                                                      |
| Study design             |                |             |        |                            |           |          |                            |           |                         |                                                      |
| EAC                      |                |             |        |                            |           |          |                            |           | < <b>0.01</b>           |                                                      |
| Population-based         | 1              | 197         | 131    | 66.5                       | 59.6–72.7 | 66       | 33.5                       | 27.3–40.4 | —                       |                                                      |
| Other                    | 9              | 42          | 5      | 20.3                       | 10.7–35.0 | 37       | 79.7                       | 65.0–89.3 | 0                       |                                                      |
| HGD-EAC                  |                |             |        |                            |           |          |                            |           | < <b>0.01</b>           |                                                      |
| Population-based         | 2              | 638         | 392    | 61.8                       | 53.7–69.3 | 246      | 38.2                       | 30.7–46.3 | 77                      |                                                      |
| Other                    | 7              | 50          | 8      | 20.4                       | 11.2–34.2 | 42       | 79.6                       | 65.8–88.8 | 0                       |                                                      |
| Study setting            |                |             |        |                            |           |          |                            |           |                         |                                                      |
| EAC                      |                |             |        |                            |           |          |                            |           | 0.61                    |                                                      |
| Multicenter              | 2              | 202         | 131    | 37.6                       | 3.1–92.0  | 71       | 62.4                       | 8.0–96.9  | 77                      |                                                      |
| Single-center            | 8              | 37          | 5      | 21.5                       | 11.2–37.3 | 32       | 78.5                       | 62.7–88.8 | 0                       |                                                      |
| HGD-EAC                  |                |             |        |                            |           |          |                            |           | < <b>0.01</b>           |                                                      |
| Multicenter              | 3              | 643         | 392    | 60.4                       | 50.1–70.0 | 251      | 39.6                       | 30.0–49.9 | 75                      |                                                      |
| Single-center            | 6              | 45          | 8      | 21.4                       | 11.6–36.2 | 37       | 78.6                       | 63.8–88.4 | 0                       |                                                      |
| Study region             |                |             |        |                            |           |          |                            |           |                         |                                                      |
| EAC                      |                |             |        |                            |           |          |                            |           | 0.52                    |                                                      |
| Europe                   | 9              | 235         | 136    | 23.7                       | 9.2–48.6  | 99       | 76.3                       | 51.4–90.8 | 68                      |                                                      |
| United States            | 1              | 4           | 0      | 10.0                       | 0.6–67.4  | 4        | 90.0                       | 32.6–99.4 | —                       |                                                      |
| HGD-EAC                  |                |             |        |                            |           |          |                            |           | NA                      |                                                      |
| Europe                   | 9              | 688         | 400    | 41.1                       | 28.4–55.2 | 288      | 58.9                       | 44.8–71.6 | —                       |                                                      |
| United States            | 0              | —           | —      | —                          | —         | —        | —                          | —         | —                       |                                                      |
| Publication date         |                |             |        |                            |           |          |                            |           |                         |                                                      |
| EAC                      |                |             |        |                            |           |          |                            |           | < <b>0.01</b>           |                                                      |
| Before 2000              | 2              | 8           | 0      | 10.0                       | 1.4–46.7  | 8        | 90.0                       | 53.3–98.6 | 0                       |                                                      |
| 2000–2009                | 7              | 34          | 5      | 22.4                       | 11.4–39.1 | 29       | 77.6                       | 60.9–88.6 | 0                       |                                                      |
| After 2010               | 1              | 197         | 131    | 66.5                       | 59.6–72.7 | 66       | 33.5                       | 27.3–40.4 | —                       |                                                      |
| HGD-EAC                  |                |             |        |                            |           |          |                            |           | < <b>0.01</b>           |                                                      |
| Before 2000              | 1              | 5           | 0      | 8.3                        | 0.5–62.2  | 5        | 91.7                       | 37.8–99.5 | —                       |                                                      |
| 2000–2009                | 5              | 30          | 6      | 24.7                       | 12.4–43.1 | 24       | 75.3                       | 56.9–87.6 | 0                       |                                                      |
| After 2010               | 3              | 653         | 394    | 56.1                       | 42.8–68.5 | 259      | 43.9                       | 31.5–57.2 | 85                      |                                                      |
| Duration of follow-up, y |                |             |        |                            |           |          |                            |           |                         |                                                      |
| EAC                      |                |             |        |                            |           |          |                            |           | 0.32                    |                                                      |
| 3–5                      | NA             | —           | —      | —                          | —         | —        | —                          | —         | —                       |                                                      |
| 5–8                      | 7              | 229         | 136    | 26.8                       | 9.9–55.0  | 93       | 73.2                       | 45.0–90.1 | 70                      |                                                      |
| ≥8                       | 3              | 10          | 0      | 11.8                       | 2.4–42.5  | 10       | 88.2                       | 57.5–97.6 | 0                       |                                                      |
| HGD-EAC                  |                |             |        |                            |           |          |                            |           | < <b>0.01</b>           |                                                      |
| 3–5                      | NA             | —           | —      | —                          | —         | —        | —                          | —         | —                       |                                                      |
| 5–8                      | 6              | 666         | 398    | 52.3                       | 40.0–64.2 | 268      | 47.7                       | 35.8–60.0 | 71                      |                                                      |
| ≥8                       | 3              | 22          | 2      | 12.8                       | 4.2–33.0  | 20       | 87.2                       | 67.0–95.8 | 0                       |                                                      |

NA, not applicable.

<sup>a</sup> $P \leq .10$ , explains source of heterogeneity between groups and appear in bold.
